# Supplementary material for: Quantitative EEG characteristics and prediction of neuromotor development in premature neonates with brain injury
Source: Research Square preprint supplement (doi:10.21203/rs.3.rs-5314670/v1), 2024-11-15
Supplement: Supplementary file 1 [file 0d518c555c224588408fb581.docx]

**Table 4** Predictive value of five early qEEG parameters on brain injury of preterm neonates

| **Variables** | **AUC** | **95%CI** | **Cut-off value** | **Sensitivity** | **Specificity** | **PPV** | **NPV** |
| --- | --- | --- | --- | --- | --- | --- | --- |
| TP, μV2 | 0.749 | 0.731-1.395 | 53.46 | 0.841 | 0.587 | 0.600 | 0.902 |
| ABP-δ, μV2 | 0.830 | 0.636-0.992 | 78.55 | 0.815 | 0.831 | 0.786 | 0.779 |
| ABP-α, μV2 | 0.721 | 0.599-0.986 | 6.28 | 0.706 | 0.605 | 0.683 | 0.688 |
| RBP-δ, % | 0.799 | 0.623-0.990 | 35.58 | 0.791 | 0.678 | 0.704 | 0.725 |
| coherence | 0.743 | 0.608-0.947 | 0.13 | 0.492 | 0.901 | 0.885 | 0.627 |

AUC: area under curve; CI: confidence intervals; PPV: positive predictive value; NPV: negative predictive value
