# Supplementary material for: Quantitative EEG characteristics and prediction of neuromotor development in premature neonates with brain injury
Source: Research Square preprint supplement (doi:10.21203/rs.3.rs-5314670/v1), 2024-11-15
Supplement: Supplementary file 2 [file 2d303b9a7f354b8a42733637.docx]

**Table 5** Comparison of GM optimality scores in neonates with and without brain injury

|  | **Total Score** | | **Sequence** | **Neck and trunk** | **Upper extremity** | **Lower extremity** |
| --- | --- | --- | --- | --- | --- | --- |
| Brain injury group (n= 43) | | 15.6±6.7 | 1.1±0.8 | 1.8±1.3 | 8.3±3.4 | 7.4±3.5 |
| Non-brain injury group (n= 65) | | 28.4±8.3 | 1.4±0.9 | 2.2±1.1 | 10.5±4.7 | 11.8±5.5 |
| Total | | 22.8±7.5 | 1.3±0.8 | 2.0±1.5 | 8.9±4.6 | 9.2±4.7 |
| t-value | | 4.098 | 1.572 | 1.662 | 3.289 | 3.978 |
| *P*-value | | 0.019∗ | 0.154 | 0.119 | 0.062 | 0.030∗ |

∗*P* < 0.05.
