# Supplementary material for: Quantitative EEG characteristics and prediction of neuromotor development in premature neonates with brain injury
Source: Research Square preprint supplement (doi:10.21203/rs.3.rs-5314670/v1), 2024-11-15
Supplement: Supplementary file 3 [file 934ee9025ad20443b8500f6a.docx]

**Table 1** Clinical characteristics of neonates with and without brain injury

| **Variables** | | | **Brain injury**  **(n= 43)** | **Non- brain injury (n= 65)** | | ***P*-value** | |
| --- | --- | --- | --- | --- | --- | --- | --- |
| Male, n (%) | | | 23 (53.5) | 36 (55.4) | | 0.165 | |
| Gestational age, weeks, Median (P25,P75) | | | 28.4 (25, 33.6) | 29.5 (25.1, 32.6) | | 0.320 | |
| Birth weight, kg, Median (P25,P75) | | | 1377 (810, 2250) | 1375 (980, 1783) | | 0.592 | |
| Cesarean sections, n (%) | | | 24 (56.5) | 37 (57.8) | | 0.435 | |
| Complications during pregnancy,  n (%) | | | 17 (38.6) | 21 (33.2) | | 0.078 | |
| Complications during labor, n (%) | | | 18 (41.9) | 13 (21.0) | | 0.037∗ | |
| 5-minute Apgar score, mean±SD | | | 6.7±1.3 | 7.1±1.2 | | 0.279 | |
| Umbilical artery or first postnatal arterial blood gas  pH, mean±SD | | | 7.0±0.3 | 7.1±0.2 | | 0.367 | |
| BE, mmol/l, mean±SD | | | -4.0±1.9 | -3.9±1.5 | | 0.466 | |
| Antenatal glucocorticoid use, n (%) | | | 26 (60.5) | 39 (60.0) | | 0.185 | |
| Antenatal use of magnesium sulfate for maternal eclampsia, n (%) | | | 17 (39.5) | 16 (24.6) | | 0.042∗ | |
| Hospital stay, days, Median (IQR) | 39 (20, 54) | | | 24 (13, 37) | | 0.023∗ |
| Invasive mechanical ventilation, n (%) | 18 (41.9) | | | 18 (27.7) | | 0.003∗∗ |
| Caffeine use, n (%) | 13 (30.2) | | | 6 (9.2) | | 0.008∗∗ |
| Parenteral nutrition, days, Median (IQR) | 30 (18, 54) | | | 20 (11, 33) | | 0.010∗∗ |
| Blood transfusion, episodes, mean±SD | 3.5±1.0 | | | 3.0±1.2 | | 0.410 |

∗*P* < 0.05, ∗∗*P* < 0.01.
