# Supplementary material for: Quantitative EEG characteristics and prediction of neuromotor development in premature neonates with brain injury
Source: Research Square preprint supplement (doi:10.21203/rs.3.rs-5314670/v1), 2024-11-15
Supplement: Supplementary file 4 [file 9a703563b3e43b3991a76931.docx]

**Table 3** Relationship between early qEEG and the occurrence of brain injury in preterm neonates

| **Variables** | **β** | **OR** | **95% CI** | ***P*-value** |
| --- | --- | --- | --- | --- |
| TP, μV2 | -0.205 | 0.683 | 0.365-1.276 | 0.044∗ |
| ABP-δ, μV2 | -0.358 | 0.890 | 0.770-1.274 | 0.035∗ |
| ABP-α, μV2 | -0.213 | 0.762 | 0.320-1.804 | 0.027∗ |
| RBP-δ, % | -0.372 | 0.944 | 0.473-1.794 | 0.019∗ |
| coherence | -0.275 | 0.647 | 0.453-0.972 | 0.026∗ |

∗*P* < 0.05.
