# Supplementary material for: Quantitative EEG characteristics and prediction of neuromotor development in premature neonates with brain injury
Source: Research Square preprint supplement (doi:10.21203/rs.3.rs-5314670/v1), 2024-11-15
Supplement: Supplementary file 5 [file b64d939884b47db9dfd01cb3.docx]

**Table 2** Comparison of early qEEG characteristics between neonates with and without brain injury.

| **Variables** | **brain injury**  **(43)** | **Non-brain injury**  **(65)** | **t-value** | **P-value** |
| --- | --- | --- | --- | --- |
| TP, μV2 | 363.92±165.41 | 489.86±158.86 | 4.025 | 0.008∗∗ |
| ABP |  |  |  |  |
| δ, μV2 | 359.35±171.96 | 469.12±147.72 | 7.789 | 0.002∗∗ |
| θ, μV2 | 9.86±3.64 | 11.53±5.22 | 1.737 | 0.062 |
| α, μV2 | 3.95±1.01 | 5.07±2.64 | 3.089 | 0.019∗ |
| β, μV2 | 3.89±1.76 | 4.86±2.12 | 1.725 | 0.145 |
| RBP |  |  |  |  |
| δ, % | 81.54±26.92 | 94.81±28.15 | 1.839 | 0.035∗ |
| θ, % | 3.97±1.46 | 2.79±1.17 | 0.756 | 0.468 |
| α, % | 1.08±0.25 | 1.29±0.37 | 1.310 | 0.189 |
| β, % | 0.99±0.23 | 1.18±0.35 | 0.752 | 0.675 |
| ATR | 0.45±0.18 | 0.47±0.21 | 0.826 | 0.465 |
| ADTR | 0.03±0.01 | 0.02±0.01 | 0.553 | 0.905 |
| SEF95, Hz | 3.49±1.32 | 4.87±1.85 | 1.734 | 0.098 |
| ApEn | 0.49±0.22 | 0.57±0.29 | 0.839 | 0.443 |
| coherence | 0.11±0.07 | 0.18±0.08 | 2.307 | 0.025∗ |
| BSI | 0.18±0.07 | 0.12±0.05 | 0.784 | 0.626 |

∗*P* < 0.05, ∗∗*P* < 0.01.
